# Supplementary material for: Senotherapeutic drug treatment ameliorates chemotherapy-induced cachexia
Source: PubMed Central journal article supplement (PMC10906225; doi:10.1172/jci.insight.169512), 2024-01-23
Supplement: jciinsight-9-169512-s050.pdf [file jciinsight-9-169512-s050.pdf]

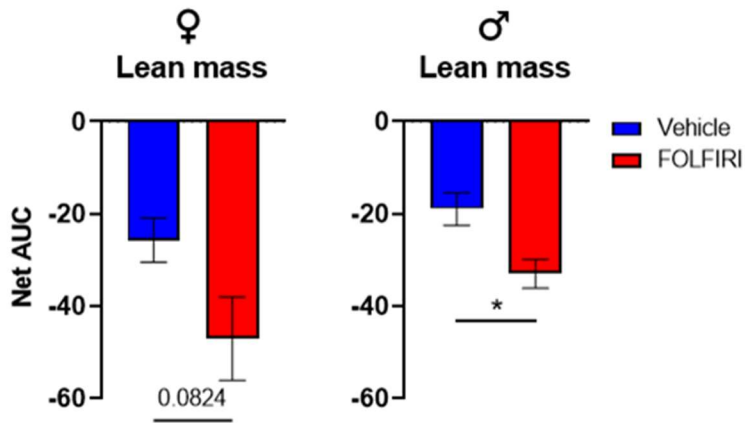

**Figure S1. Lean mass in response to FOLFIRI.** Lean mass net area under the curve quantified for females (♀) and males (♂). Data represent mean ± SD, \*P < 0.05, as assessed by unpaired two-tailed *t* test.

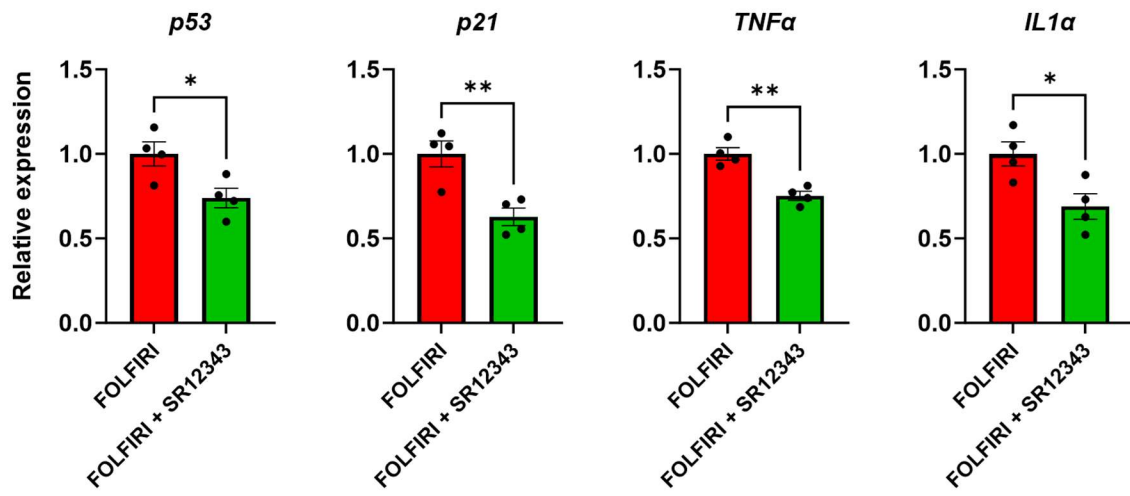

**Figure S2. SR12343 reduces markers of cellular senescence in C2C12 myotubes.**

Markers of senescence assessed by RT-qPCR. Data represent mean  $\pm$  SD. \*P < 0.05;

\*\*P < 0.01, as assessed by unpaired two-tailed t test.

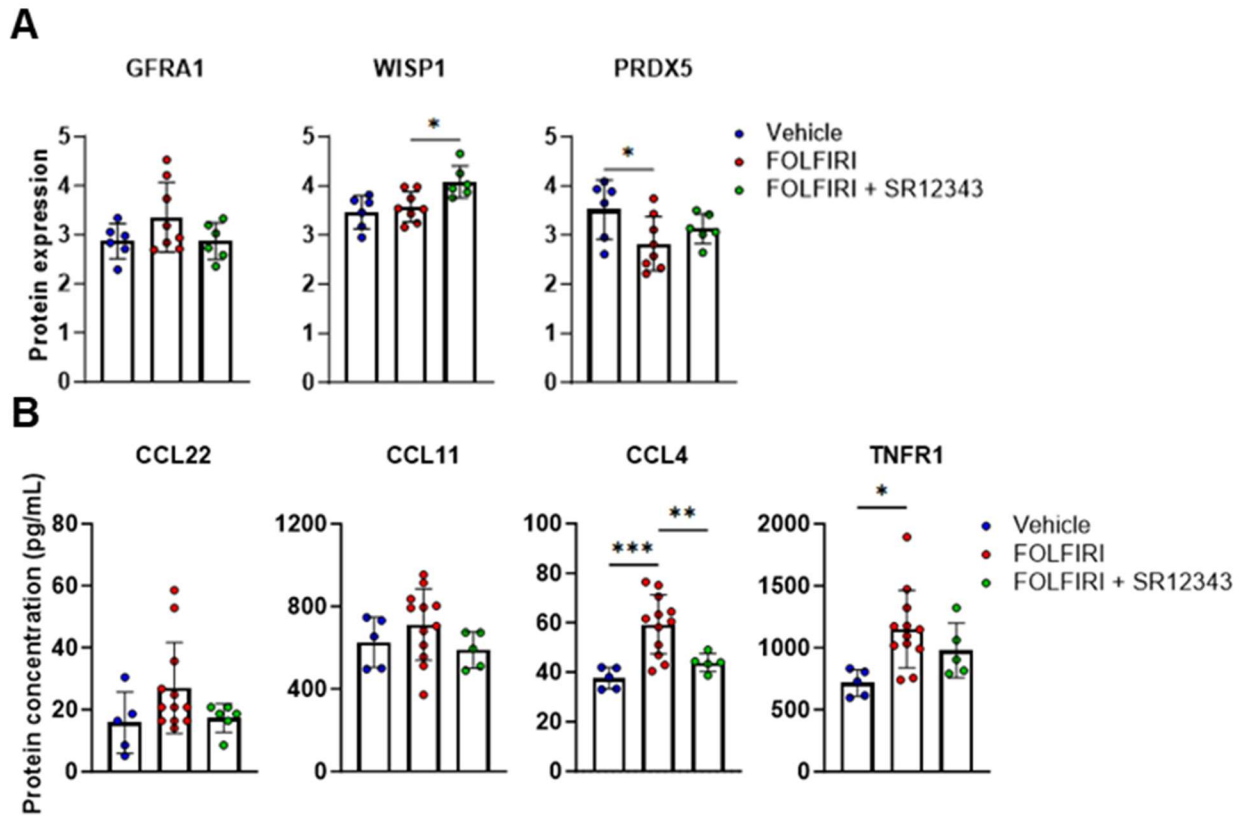

**Figure S3. Circulating factors in response to FOLFIRI and SR12343.** Circulating proteins assessed by the (A) Olink multiplex immunoassay and (B) ELLA and Magpix multiplex platforms. Data represent mean  $\pm$  SD. \* $P < 0.05$ ; \*\* $P < 0.01$ ; \*\*\* $P < 0.001$ , as assessed by one-way ANOVA with a Šidák correction.

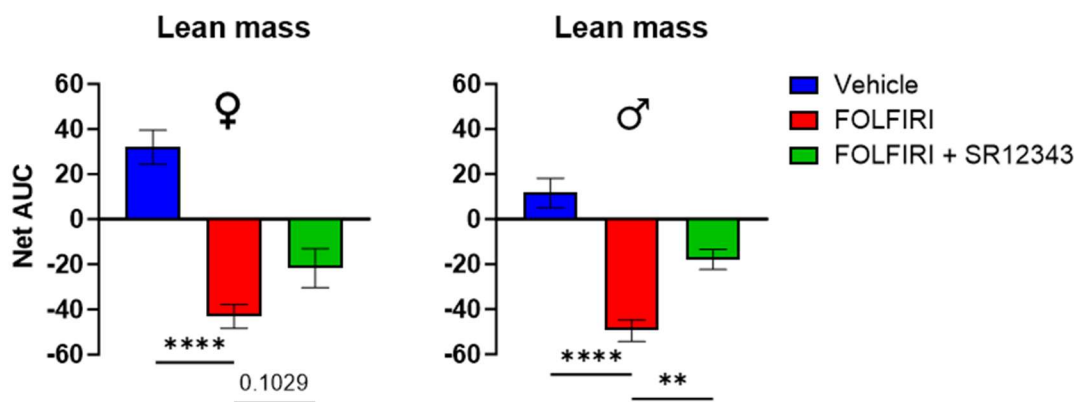

**Figure S4. Lean mass in response to FOLFIRI and SR12343.** Lean mass net area under the curve quantified for females (♀) and males (♂). Data represent mean  $\pm$  SD. \*\*P < 0.01; \*\*\*\*P < 0.0001, as assessed by one-way ANOVA with a Šidák correction.

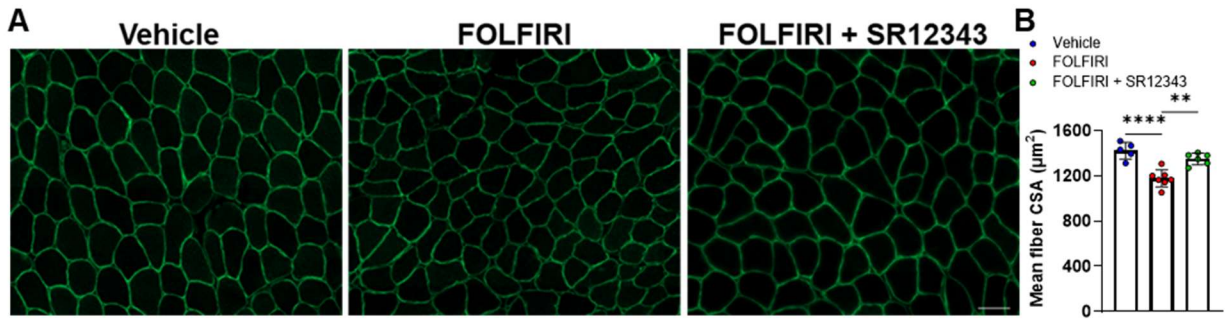

**Figure S5. SR12343 attenuates muscle fiber atrophy in response to chemotherapy.** (A) Representative immunofluorescence images of skeletal muscle cross sections stained for dystrophin; scale bar = 50 μm. (B) Quantification of mean skeletal muscle fiber cross-sectional area (CSA). Data represent mean ± SD. \*\*P < 0.01; \*\*\*P < 0.0001, as assessed by one-way ANOVAs with a Šidák correction.

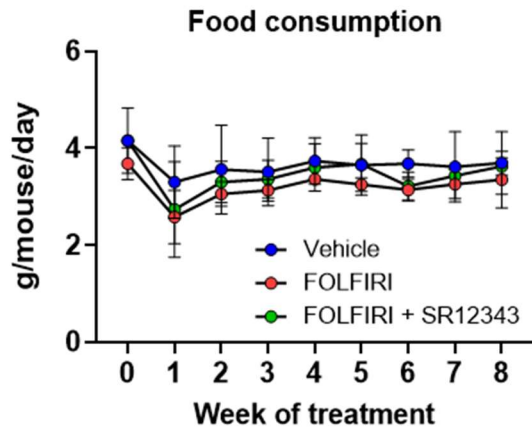

**Figure S6. Drug treatments did not lead to between-group differences in food consumption.** Longitudinal measurements of food consumption.

## Supplemental Table 1

| Gene   | Probe (5'-3')                                   | Primer 1 (5'-3')       | Primer 2 (5'-3')        |
|--------|-------------------------------------------------|------------------------|-------------------------|
| Ccl2   | /56-FAM/ACTCACCTG/ZEN/CTGCTACTCATTACCC/3IABkFQ/ | CATCCACGTGTTGGCTCA     | AACTACAGCTTCTTTGGGACA   |
| Cdkn1a | /56-FAM/TGTCTGAGC/ZEN/GGCCTGAAGATTCC/3IABkFQ/   | AATCTGCGCTTGGAGTGATAG  | CTTGTGCTGTCTTGCACT      |
| Cdkn2a | /56-FAM/TGCACCGTA/ZEN/GTTGAGCAGAAGAGC/3IABkFQ/  | GAGAAGGTAGTGGGGTCT     | GAACTTTTCGGTCGTACCC     |
| Cxcl1  | /56-FAM/ATCCCTCTC/ZEN/GCAAGACGGTC/3IABkFQ/      | TGATTTCAAGCTTCCCTATGGC | ATTTCTGCCTCATCTGCT      |
| Igfbp7 | /56-FAM/ATCCCAACC/ZEN/CCTGTCCTCATCTG/3IABkFQ/   | AAGGTGTTCTTGAGCTGTGAG  | CAAGAGTTCTGTCCGCTGAA    |
| Il1α   | /56-FAM/CCATCCAAC/ZEN/CCAGATCAGCACCT/3IABkFQ/   | CTGCAGTCCATAACCCATGA   | ACAAACTTCTGCCTGACGAG    |
| Il1β   | /56-FAM/TTCCAAACC/ZEN/TTGACCTGGGCTGT/3IABkFQ/   | GACCTGTTCTTTGAAGTTGACG | CTCTTGTGATGTGCTGCTG     |
| Il6    | /56-FAM/CCTACCCA/ZEN/ATTTCCAATGCTCTCCT/3IABkFQ/ | TCCTTAGCCACTCCTTCTGT   | AGCCAGAGTCCTCAGAGA      |
| Mmp12  | /56-FAM/AGCTGTCTT/ZEN/TGACCCACTTCGCC/3IABkFQ/   | GCTCCTGCCTCACATCATA    | GGCTTCTCTGCATCTGTGAA    |
| p53    | /56-FAM/ATGGCAGTC/ZEN/ATCCAGTCTTCGGAG/3IABkFQ/  | TGAAAATGTCTCCTGGCTCAG  | CTAGCATTAGGCCCTCATC     |
| Pai1   | /56-FAM/ACTTTGGT/ZEN/ATGCCTTTCCACCCA/3IABkFQ/   | CTATGGTGAAACAGGTGGACT  | CGTGTACGCTCGTCTACAG     |
| Sting1 | /56-FAM/CTGGAGCCC/ZEN/TGGTAAGATCAACCG/3IABkFQ/  | AAGTCTCTGCAGTCTGTGAAG  | TGTAGCTGATTGAACATTGCGA  |
| Tgfb1  | /56-FAM/ATAGATGGC/ZEN/GTTGTTGCGGTCCA/3IABkFQ/   | GCGGACTACTATGCTAAAGAGG | CCGAATGTCTGACGTATTGAAGA |
| Tnfa   | /56-FAM/CCACGTCGT/ZEN/AGCAAACCACCAAGT/3IABkFQ/  | AGACCCTCACACTCAGATCA   | TCTTTGAGATCCATGCCGTTG   |

Supplemental Table 2

|                                             |         |
|---------------------------------------------|---------|
| <b>Figure 1B</b>                            |         |
| <u>Body weight: Group x Sex interaction</u> |         |
| Source of Variation                         | P value |
| Interaction                                 | 0.9849  |
| <u>Lean mass: Group x Sex interaction</u>   |         |
| Source of Variation                         | P value |
| Interaction                                 | 0.7242  |
| <u>Fat mass: Group x Sex interaction</u>    |         |
| Source of Variation                         | P value |
| Interaction                                 | 0.3245  |
| <b>Figure 6A</b>                            |         |
| <u>Body weight: Group x Sex interaction</u> |         |
| Source of Variation                         | P value |
| Interaction                                 | 0.1493  |
| <u>Lean mass: Group x Sex interaction</u>   |         |
| Source of Variation                         | P value |
| Interaction                                 | 0.2522  |
| <u>Fat mass: Group x Sex interaction</u>    |         |
| Source of Variation                         | P value |
| Interaction                                 | 0.1936  |
