# Supplementary material for: Senotherapeutic drug treatment ameliorates chemotherapy-induced cachexia
Source: PubMed Central journal article supplement (PMC10906225; doi:10.1172/jci.insight.169512), 2024-01-23
Supplement: jciinsight-9-169512-s051.pdf [file jciinsight-9-169512-s051.pdf]

| Gene   | Probe (5'-3')                                   | Primer 1 (5'-3')       | Primer 2 (5'-3')        |
|--------|-------------------------------------------------|------------------------|-------------------------|
| Ccl2   | /56-FAM/ACTCACCTG/ZEN/CTGCTACTCATTACC/3IABkFQ/  | CATCCACGTGTTGGCTCA     | AACTACAGCTTCTTTGGGACA   |
| Cdkn1a | /56-FAM/TGTCTGAGC/ZEN/GGCCTGAAGATTCC/3IABkFQ/   | AATCTGCGCTTGGAGTGATAG  | CTTGTCGCTGTCTTGCACT     |
| Cdkn2a | /56-FAM/TGCACCGTA/ZEN/GTTGAGCAGAAGAGC/3IABkFQ/  | GAGAAGGTAGTGGGGTCCT    | GAACTCTTCGGTCGTACCC     |
| Cxcl1  | /56-FAM/ATCCCTCTC/ZEN/GCAAGACGGTC/3IABkFQ/      | TGATTTCAAGCTTCCCTATGGC | ATTTCTGCCTCCTCCTGCT     |
| Igfbp7 | /56-FAM/ATCCCAACC/ZEN/CCTGTCCTCATCTG/3IABkFQ/   | AAGGTGTTCTTGAGCTGTGAG  | CAAGAGTTCTGTCCGCTGAA    |
| Il1α   | /56-FAM/CCATCCAAC/ZEN/CCAGATCAGCACCT/3IABkFQ/   | CTGCAGTCCATAAACCATGA   | ACAAACTTCTGCCTGACGAG    |
| Il1β   | /56-FAM/TTCCAAACC/ZEN/TTGACCTGGGCTGT/3IABkFQ/   | GACCTGTTCTTTGAAGTTGACG | CTCTTGTGATGTGCTGCTG     |
| Il6    | /56-FAM/CCTACCCA/ZEN/ATTTCCAATGCTCTCCT/3IABkFQ/ | TCCTTAGCCACTCCTTCTGT   | AGCCAGAGTCCTCAGAGA      |
| Mmp12  | /56-FAM/AGTGTCTT/ZEN/TGACCACTTCGCC/3IABkFQ/     | GCTCCTGCCTCACATCATA    | GGCTTCTCTGCATCTGTGAA    |
| p53    | /56-FAM/ATGGCAGTC/ZEN/ATCCAGTCTTCGGAG/3IABkFQ/  | TGAAAATGTCTCCTGGCTCAG  | CTAGCATTACAGGCCCTCCTC   |
| Pai1   | /56-FAM/ACTTTGGT/ZEN/ATGCCTTTCCACCCA/3IABkFQ/   | CTATGGTGAAACAGGTGGACT  | CGTGTGAGCTCGTCTACAG     |
| Sting1 | /56-FAM/CTGGAGCCC/ZEN/TGGTAAGATCAACCG/3IABkFQ/  | AAGTCTCTGCAGTCTGTGAAG  | TGTAGCTGATTGAACATTGGA   |
| Tgfb1  | /56-FAM/ATAGATGGC/ZEN/GTTGTTGCGGTCCA/3IABkFQ/   | GCGGACTACTATGCTAAAGAGG | CCGAATGTCTGACGTATTGAAGA |
| Tnfa   | /56-FAM/CCACGTCGT/ZEN/AGCAAACCAACCAAGT/3IABkFQ/ | AGACCCTCACACTCAGATCA   | TCTTTGAGATCCATGCCGTTG   |
